# Supplementary material
Source: Springer Nature journal article supplement (https://www.springermedizin.de/resource/supplementary/12889_2011_3519_MOESM1_ESM.pdf/9489246)
Supplement: MOESM1 [file 9489246]

**Remaining****Observations not included**

Whole sample  
11,864

Missing information  
about income from  
work prior to the  
stroke  
39 (0.3%)

11,825

Earning less than €  
6,600 the year prior to  
the stroke  
4003 (33.7%)

7822

Died without being  
discharged from  
hospital  
709 (6.0%)

7113

Missing information  
about return to work  
(income from work  
after the stroke)  
12 (0.1%)

7101

Missing information  
about education  
6 (0.05%)

7095

Missing information  
about other  
independent variables  
14 (0.1%)

7081 Analysed
